# Supplementary material for: ML-Based Sensitivity-Aware Selective Image Encryption Algorithm
Source: Research Square preprint supplement (doi:10.21203/rs.3.rs-8471451/v1), 2026-01-12
Supplement: Supplementary file 2 [file 872c810fd21adc6155977d96.pdf]

# **Supplementary Material S3: Reproducibility Guide**

## **Overview**

This guide describes how to reproduce the experimental results reported in the manuscript.

## **Software Environment**

Python 3.10, OpenCV, NumPy, Scikit-learn, PyCryptodome.

## **Datasets**

Public datasets: BSDS500, CelebA, NIH Chest X-ray.

## **Execution Steps**

Step-by-step execution order for feature extraction, training, and encryption.

## **Reproducibility Notes**

Fixed random seeds and consistent parameters were used across all experiments.
