# Supplementary material for: ML-Based Sensitivity-Aware Selective Image Encryption Algorithm
Source: Research Square preprint supplement (doi:10.21203/rs.3.rs-8471451/v1), 2026-01-12
Supplement: Supplementary file 3 [file 9ba7e482cceaf56908e5e61f.pdf]

# Supplementary Material S1: Algorithm Implementation Details (Expanded)

## 1. Feature Extraction Formulas

Entropy:  $H = - \sum p(i) \log_2 p(i)$   
Edge Density:  $ED = (\text{Number of edge pixels}) / (\text{Total pixels})$   
Texture Variance:  $\sigma^2 = (1/N) \sum (x_i - \mu)^2$   
Spatial Frequency:  $SF = \text{sqrt}(RF^2 + CF^2)$

## 2. ML Model Parameters

| Model               | Key Parameters                 |
|---------------------|--------------------------------|
| SVM                 | RBF kernel, C=10, $\gamma=0.1$ |
| Random Forest       | 100 trees, max depth=20        |
| Logistic Regression | L2 regularization              |
| CNN                 | 3 conv layers, ReLU, Adam      |

## 3. Encryption Configuration

AES-256-GCM is used with PBKDF2 key derivation. Highly sensitive blocks receive double encryption, medium blocks single encryption.
